# Supplementary material for: Semi-quantitative analysis of metal alloys, brass and soil samples by calibration-free laser-induced breakdown spectroscopy: recent results and considerations
Source: Royal Society of Chemistry journal article supplement (doi:10.1039/b820493d), 2009-01-01

**Semi-quantitative analysis of metal alloys, brass and soil samples by calibration-free laser-induced breakdown spectroscopy: recent results and considerations**

**Kathleen K. Herrera, Elisabetta Tognoni <sup>a</sup>, Nicolás Omenetto <sup>\*</sup>, Benjamin W. Smith and James D. Winefordner**

*Department of Chemistry, University of Florida, Gainesville, FL 32611, United States*

*<sup>a</sup> Institute for Chemical-Physical Processes, National Research Council, Via Moruzzi I, 56124 Pisa, Italy; <sup>\*</sup> E-mail: [omenetto@chem.ufl.edu](mailto:omenetto@chem.ufl.edu); Fax: +1-352-3925362; Tel.: +1-352-3929853*

Fig. 1. Example of a merged spectrum of an aluminum alloy sample. The different colors depict the 67 individual spectral windows optimally spliced together using an in-house merging software written in Q-Basic.

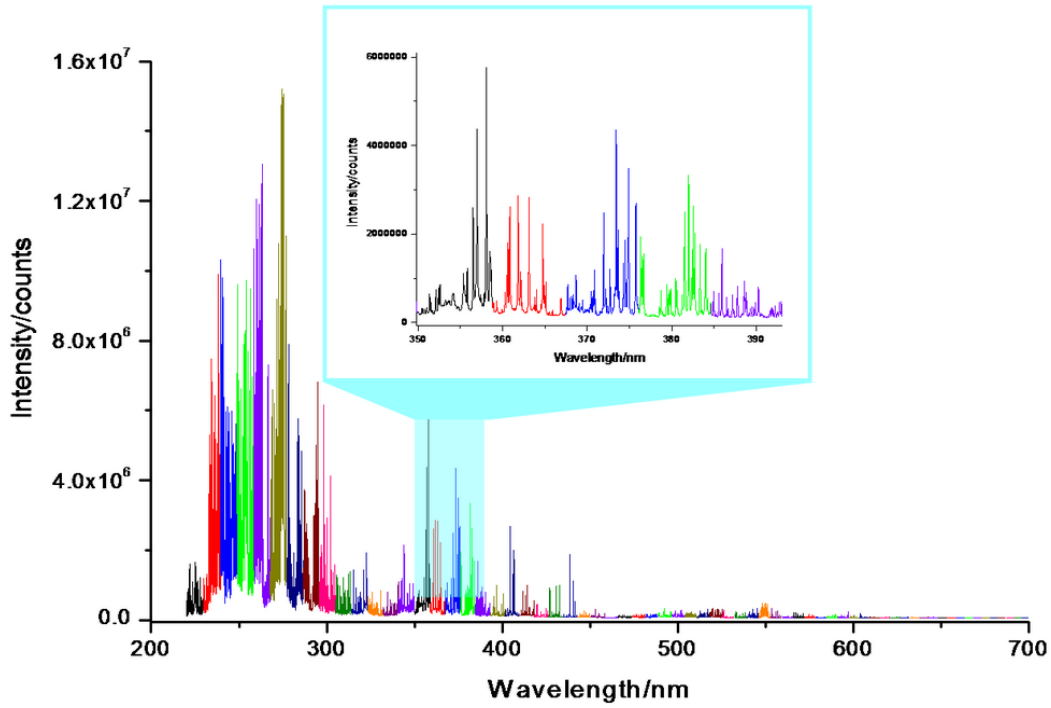

Fig. 2. Relative spectral efficiency of the detection system.

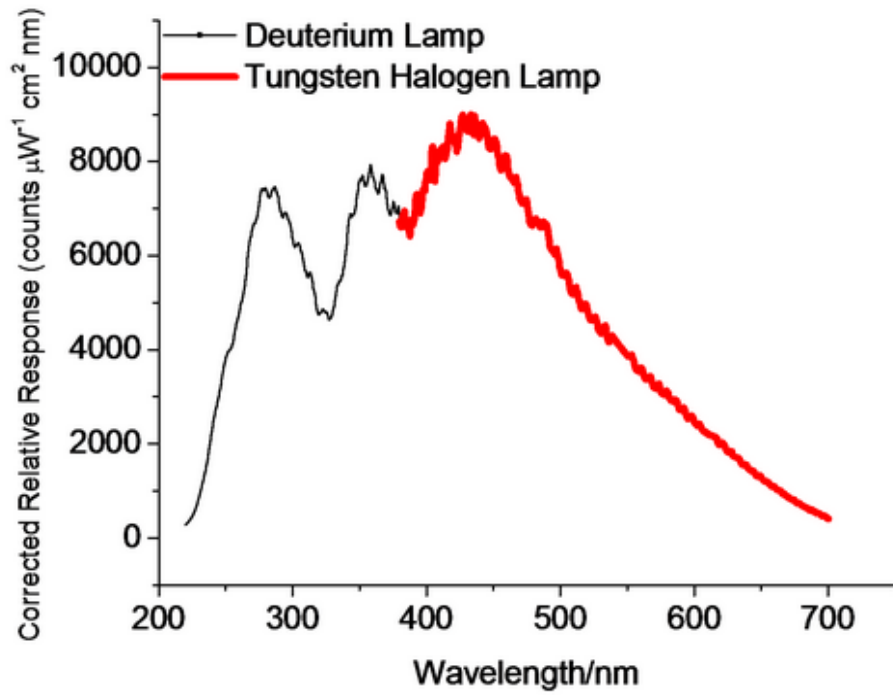

Fig. 3. Images showing the temporal evolution of laser-induced plasmas obtained from Al alloy B8. The plasma is propelled away from the target surface indicated by the dashed yellow line.

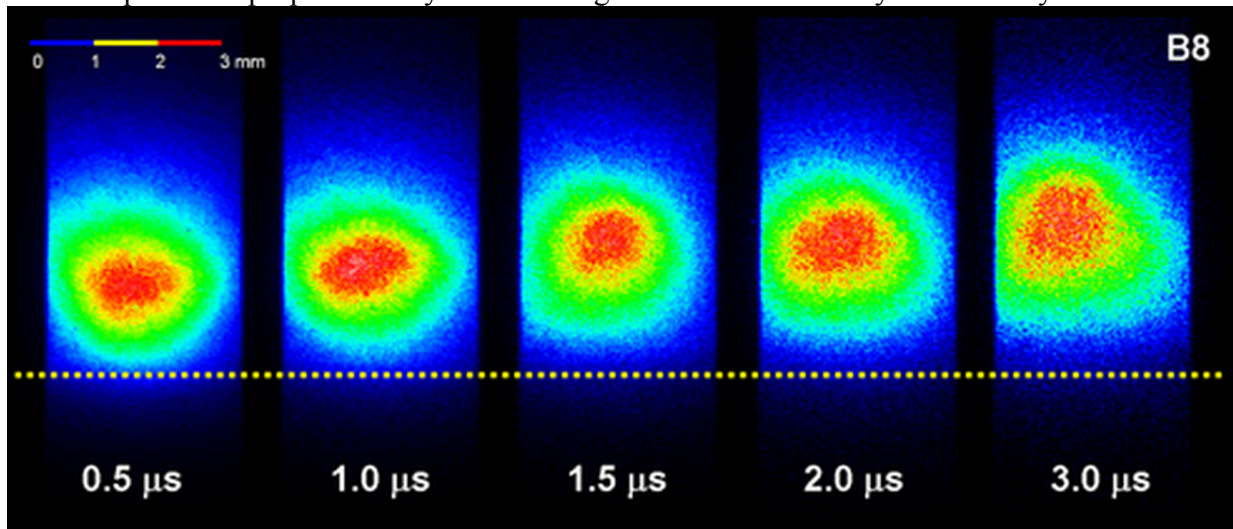

Fig. 4. Images of the laser-induced plasma obtained from Al alloy B8 at 3 different ambient pressures.

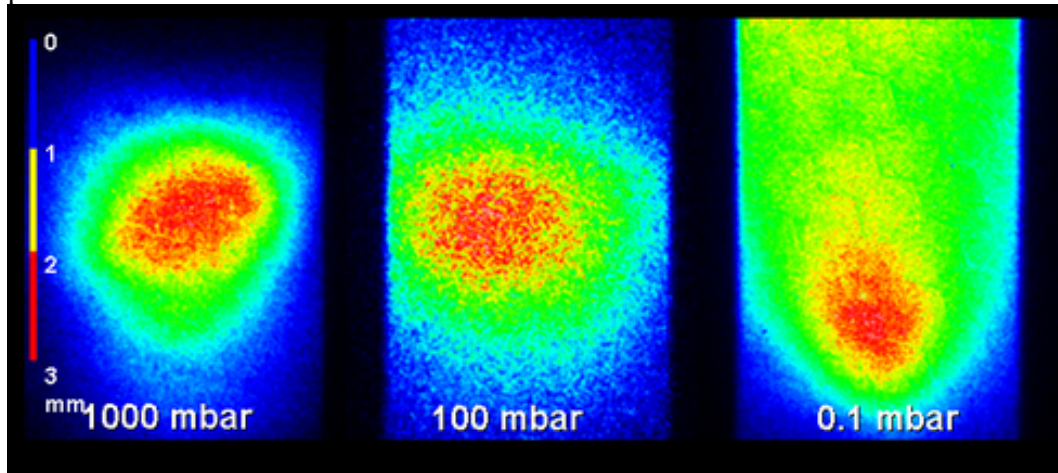

Supplement: b820493d.pdf [file b820493d.pdf]
